# Supplementary material for: High-Temperature and Drought Stress Effects on Growth, Yield and Nutritional Quality with Transpiration Response to Vapor Pressure Deficit in Lentil
Source: MDPI journal article supplement (doi:10.3390/plants11010095), 2021-12-28
Supplement: s1 [file s1]

**Table S1.** ANOVA analysis for 20 lines of under normal and late planting trials at Marchouch.

|                | PLH  | EGV  | DFE  | D50F | D50P | DM   | NFPP  | NUPP | NTPP  | GYP  | HSW  | CP   | Zn   | Fe   |
|----------------|------|------|------|------|------|------|-------|------|-------|------|------|------|------|------|
| Gen (G)        | **   | **   | **   | **   | **   | **   | *     | *    | *     | *    | **   | **   | **   | **   |
| Trt (T)        | **   | **   | **   | **   | **   | **   | **    | **   | **    | **   | **   | **   | **   | **   |
| G*T            | *    | **   | **   | *    | **   | *    | *     | ns   | *     | *    | ns   | **   | **   | **   |
| Error          | 2.7  | 2.4  | 0.9  | 3.3  | 2.7  | 1.2  | 859.3 | 19.2 | 868.8 | 1.3  | 0.1  | 0.2  | 15.4 | 16.1 |
| CV             | 7.1  | 7.9  | 1.3  | 2.4  | 1.8  | 0.9  | 36.8  | 49.3 | 25.8  | 35.3 | 12.9 | 2.1  | 9.1  | 5.2  |
| R <sup>2</sup> | 0.92 | 0.92 | 0.99 | 0.98 | 0.99 | 0.99 | 0.78  | 0.64 | 0.79  | 0.75 | 0.91 | 0.99 | 0.90 | 0.92 |

\*, \*\* and ns indicate significant difference at 0.01 and 0.001, and ns denotes a non-significant. PLH, plant height; EGV, early growth vigor; DFE, days to first flowering; D50F, days to 50% flowering; D50P, days to 50% podding; DM, days to 95% maturity; NFPP, number of filled pods per plant; NUPP, number of unfilled pods per plant; NTPP, number of total pods per plant; GYP, grain yield per plant; HSW, hundred-seed weight; CP, crude protein; Zn, zinc content; Fe, iron content.

**Table S2.** Correlation between tested traits under normal conditions conducted at Marchouch.

|      | PLH   | EGV    | DFE    | D50F   | D50P   | DM   | NFPP  | NUPP | NTPP  | GYP  | HSW   | CP     | Zn    | Fe |
|------|-------|--------|--------|--------|--------|------|-------|------|-------|------|-------|--------|-------|----|
| PLH  | 1     |        |        |        |        |      |       |      |       |      |       |        |       |    |
| EGV  | .38*  | 1      |        |        |        |      |       |      |       |      |       |        |       |    |
| DFE  | -.02  | -.46** | 1      |        |        |      |       |      |       |      |       |        |       |    |
| D50F | -.10  | -.53** | .70**  | 1      |        |      |       |      |       |      |       |        |       |    |
| D50P | -.15  | -.61** | .49**  | .30    | 1      |      |       |      |       |      |       |        |       |    |
| D95M | -.24  | -.29   | -.12   | .01    | .13    | 1    |       |      |       |      |       |        |       |    |
| NFPP | .25   | .08    | -.14   | .03    | -.23   | .04  | 1     |      |       |      |       |        |       |    |
| NUPP | -.40* | -.23   | .09    | -.06   | .15    | .01  | -.28  | 1    |       |      |       |        |       |    |
| NTPP | .21   | .05    | -.13   | .02    | -.22   | .04  | .99** | -.16 | 1     |      |       |        |       |    |
| GYP  | .23   | .16    | -.15   | .01    | -.29   | .02  | .97** | -.23 | .96** | 1    |       |        |       |    |
| HSW  | .24   | .62**  | -.53** | -.58** | -.48** | -.21 | .07   | -.14 | .05   | .12  | 1     |        |       |    |
| CP   | -.02  | -.03   | .03    | .10    | -.10   | -.31 | .03   | .09  | .05   | .01  | -.13  | 1      |       |    |
| Zn   | -.02  | -.27   | .04    | -.14   | .30    | .22  | -.03  | .01  | -.03  | -.08 | .02   | -.47** | 1     |    |
| Fe   | -.27  | -.61** | .19    | .14    | .52**  | .38* | -.21  | .19  | -.19  | -.28 | -.39* | -.35*  | .68** | 1  |

\* and \*\* indicate significant difference at 0.05 and 0.01. PLH, plant height; EGV, early growth vigor; DFE, days to first flowering; D50F, days to 50% flowering; D50P, days to 50% podding; DM, days to 95% maturity; NFPP, number of filled pods per plant<sup>-1</sup>; NUPP, number of unfilled pods per plant<sup>-1</sup>; NTPP, number of total pods per plant<sup>-1</sup>; GYP, grain yield per plant<sup>-1</sup>; HSW, hundred-seed weight; CP, crude protein; Zn, zinc content; Fe, iron content.

**Table S3.** Correlation for late under combined temperature-drought stress (above) and temperature stress (below).

|      | PLH  | EGV           | DFF           | D50F          | D50P         | DM            | NFPP         | NUPP | NTPP         | GYP          | HSW         | CP           | Zn            | Fe            |
|------|------|---------------|---------------|---------------|--------------|---------------|--------------|------|--------------|--------------|-------------|--------------|---------------|---------------|
| PLH  | 1    | <b>.40**</b>  | -.10          | -.02          | -.15         | -.13          | -.07         | .06  | -.06         | -.03         | .16         | -.14         | .09           | .21           |
| EGV  | .18  | 1             | <b>-.43**</b> | <b>-.40**</b> | <b>-.39*</b> | <b>-.44**</b> | -.23         | -.21 | -.27         | -.11         | .25         | -.11         | .12           | .26           |
| DFF  | -.06 | <b>-.41**</b> | 1             | <b>.66**</b>  | <b>.54**</b> | <b>.42**</b>  | .03          | .09  | .05          | .02          | .08         | .17          | -.28          | -.17          |
| D50F | -.17 | <b>-.47**</b> | <b>.81**</b>  | 1             | <b>.77**</b> | <b>.63**</b>  | .07          | -.02 | .07          | .03          | <b>.34*</b> | .19          | -.31*         | -.11          |
| D50P | -.07 | <b>-.52**</b> | <b>.68**</b>  | <b>.79**</b>  | 1            | <b>.74**</b>  | .16          | .19  | .19          | .16          | .30         | .16          | -.24          | -.15          |
| DM   | -.05 | -.21          | .19           | <b>.32*</b>   | <b>.40*</b>  | 1             | <b>.32*</b>  | .11  | <b>.34*</b>  | .25          | .12         | .12          | <b>-.40*</b>  | -.19          |
| NFPP | .01  | .14           | -.20          | -.09          | -.07         | .08           | 1            | -.06 | <b>.98**</b> | <b>.90**</b> | -.11        | .06          | -.09          | -.10          |
| NUPP | .15  | -.09          | .05           | .13           | .17          | .09           | .05          | 1    | .13          | -.02         | -.11        | .15          | -.09          | -.24          |
| NTPP | .03  | .13           | -.19          | -.08          | -.05         | .09           | <b>.99**</b> | .15  | 1            | <b>.89**</b> | -.13        | .09          | -.11          | -.15          |
| GYP  | -.04 | -.02          | -.15          | .01           | -.03         | -.07          | <b>.88**</b> | -.02 | <b>.86**</b> | 1            | .02         | .05          | -.01          | -.04          |
| HSW  | -.25 | -.02          | <b>.53**</b>  | <b>.38*</b>   | .25          | -.22          | -.13         | -.08 | -.14         | -.04         | 1           | <b>.32*</b>  | -.14          | .02           |
| CP   | .03  | -.06          | -.09          | -.15          | -.12         | <b>.36*</b>   | .28          | -.03 | .28          | .12          | -.31        | 1            | <b>-.45**</b> | <b>-.43**</b> |
| Zn   | .01  | .12           | .29           | .29           | .16          | -.15          | -.17         | .24  | -.14         | -.12         | <b>.34*</b> | <b>-.36*</b> | 1             | <b>.48**</b>  |
| Fe   | -.01 | -.24          | .25           | <b>.37*</b>   | .29          | -.01          | .26          | .03  | .26          | <b>.34*</b>  | .14         | -.11         | <b>.46**</b>  | 1             |

\* and \*\* indicate significant difference at 0.05 and 0.01. PLH, plant height; EGV, early growth vigor; DFF, days to first flowering; D50F, days to 50% flowering; D50P, days to 50% podding; DM, days to 95% maturity; NFPP, number of filled pods per plant<sup>-1</sup>; NUPP, number of unfilled pods per plant<sup>-1</sup>; NTPP, number of total pods per plant<sup>-1</sup>; GYP, grain yield per plant<sup>-1</sup>; HSW, hundred-seed weight; CP, crude protein; Zn, zinc content; Fe, iron content.

**Table S4.** Contribution of traits to the three first PCA dimensions under normal conditions, temperature stress, and the combined temperature-drought stress.

| Traits | Normal |       |       | Temperature stress |       |       | Temperature-drought stress |       |       |
|--------|--------|-------|-------|--------------------|-------|-------|----------------------------|-------|-------|
|        | PC1    | PC2   | PC3   | PC1                | PC2   | PC3   | PC1                        | PC2   | PC3   |
| PLH    | 6.21   | 1.45  | 0.20  | 2.36               | 0.01  | 0.00  | 1.55                       | 0.64  | 19.81 |
| EGV    | 13.82  | 6.89  | 0.11  | 5.78               | 6.05  | 7.37  | 8.35                       | 0.09  | 1.16  |
| DFF    | 5.69   | 5.13  | 10.94 | 18.01              | 3.05  | 0.02  | 8.46                       | 7.05  | 1.95  |
| D50F   | 3.23   | 12.15 | 14.53 | 18.00              | 6.66  | 0.00  | 11.38                      | 7.30  | 11.18 |
| D50P   | 17.59  | 0.51  | 0.15  | 15.23              | 6.12  | 2.27  | 12.29                      | 4.13  | 5.21  |
| DM     | 4.87   | 0.83  | 8.63  | 1.14               | 5.89  | 24.59 | 16.56                      | 0.48  | 2.11  |
| NFPP   | 5.83   | 21.55 | 0.85  | 8.51               | 19.57 | 2.72  | 6.21                       | 24.03 | 1.48  |
| NUPP   | 5.39   | 2.66  | 0.31  | 0.07               | 1.31  | 0.10  | 7.30                       | 22.50 | 0.46  |
| NTPP   | 4.53   | 22.24 | 0.77  | 8.02               | 19.91 | 2.73  | 0.98                       | 1.55  | 14.36 |
| GYP    | 5.56   | 20.82 | 0.54  | 4.74               | 21.15 | 5.37  | 4.91                       | 21.10 | 2.02  |
| HSW    | 11.41  | 2.83  | 7.80  | 8.77               | 0.31  | 8.70  | 0.33                       | 6.91  | 7.12  |
| CP     | 0.46   | 0.17  | 18.38 | 2.79               | 3.52  | 17.92 | 5.66                       | 3.40  | 8.83  |
| Zn     | 2.80   | 0.97  | 25.43 | 5.79               | 0.21  | 18.69 | 7.65                       | 0.73  | 6.88  |
| Fe     | 12.60  | 1.79  | 11.36 | 3.22               | 7.55  | 9.63  | 8.36                       | 0.08  | 17.43 |

PLH, plant height; EGV, early growth vigor; DFF, days to first flowering; D50F, days to 50% flowering; D50P, days to 50% podding; DM, days to 95% maturity; NFPP, number of filled pods per plant<sup>-1</sup>; NUPP, number of unfilled pods per plant<sup>-1</sup>; NTPP, number of total pods per plant<sup>-1</sup>; GYP, grain yield per plant<sup>-1</sup>; HSW, hundred-seed weight; CP, crude protein; Zn, zinc content; Fe, iron content.

**Table S5.** Analysis of variance for canopy temperature between normal conditions, temperature stress and the combined temperature-drought stress at Marchouch.

| Source    | df  | Mean Square | F     |
|-----------|-----|-------------|-------|
| TRT       | 9   | 58.11*      | 64.54 |
| Gen       | 19  | 2.99*       | 3.33  |
| Rep       | 1   | 1.50ns      | 1.67  |
| TRT * Gen | 171 | .89ns       | .99   |

\* indicates significant difference at 0.001 of probability, and ns denotes non-significant

**Table S6.** Minimum, Maximum, Mean of canopy temperature under normal conditions, temperature stress and the combined temperature-drought stress at Marchouch.

| Days    | Temperature-drought stress |                 |                 |                  | Temperature stress |                  |                |                | Normal         |                  |
|---------|----------------------------|-----------------|-----------------|------------------|--------------------|------------------|----------------|----------------|----------------|------------------|
|         | 65                         | 70              | 80              | 90               | 65                 | 70               | 80             | 90             | 100            | 115              |
| Min     | 27.80                      | 29.70           | 29.30           | 28.40            | 27.70              | 29.50            | 29.30          | 29.60          | 26.60          | 29.70            |
| Max     | 31.30                      | 33.60           | 33.90           | 34.00            | 31.30              | 33.10            | 32.40          | 33.80          | 32.70          | 33.40            |
| Mean±SD | 29.53e±<br>0.8             | 31.89ab<br>±0.8 | 31.64cd<br>±1.1 | 31.76abc<br>±1.2 | 29.20f±<br>0.8     | 31.67bcd<br>±0.9 | 31.50d±<br>0.8 | 31.96a±<br>0.8 | 29.10f±<br>1.4 | 31.78abc<br>±1.1 |
| LSD     | 0.61                       | 0.59            | 0.73            | 1.01             | 0.54               | 0.62             | 0.64           | 0.69           | 1.07           | 0.78             |
| CV      | 2.50                       | 2.16            | 2.73            | 4.22             | 2.17               | 2.31             | 2.47           | 2.57           | 4.78           | 2.93             |

Means followed by the same letters are not significantly different (p<0.05).

**Table S7.** Description of origin, IG number and classification of lentil genotypes used in the current study. MHT: Moderately heat tolerant; MDT: Moderately drought tolerant, HT: heat tolerant, HS: heat sensitive, DT: drought tolerant, DS: drought sensitive.

| Genotype | IG number | Origin   | Classification |
|----------|-----------|----------|----------------|
| ILL 3484 | 3484      | Nepal    | MT             |
| Bakria   | 4605      | Morocco  | MT             |
| ILL 5919 | 69528     | Ethiopia | HS; DS         |
| ILL 6075 | 70130     | Pakistan | DT             |
| ILL 6104 | 70159     | Pakistan | HT             |
| ILL 6338 | 71270     | Pakistan | HT             |
| ILL 6359 | 71291     | Pakistan | MT             |
| ILL 6362 | 71294     | Pakistan | HDT            |
| ILL 6363 | 71295     | Pakistan | MT             |
| ILL 7223 | 75942     | Nepal    | MT             |
| ILL 7286 | 76005     | Nepal    | HT             |
| ILL 7804 | 114892    | Nepal    | HDT            |
| ILL 7813 | 114929    | Nepal    | HS; HDS        |
| ILL 7814 | 114931    | Nepal    | HT; HDT        |
| ILL 7819 | 114948    | Nepal    | MT             |
| ILL 7820 | 114951    | Nepal    | HS; HDS        |
| ILL 7833 | 115006    | Nepal    | HT             |
| ILL 7835 | 115010    | Nepal    | HT; HDT        |
| ILL 8025 | 117726    | Pakistan | MT             |
| ILL 8029 | 117734    | Pakistan | HT             |

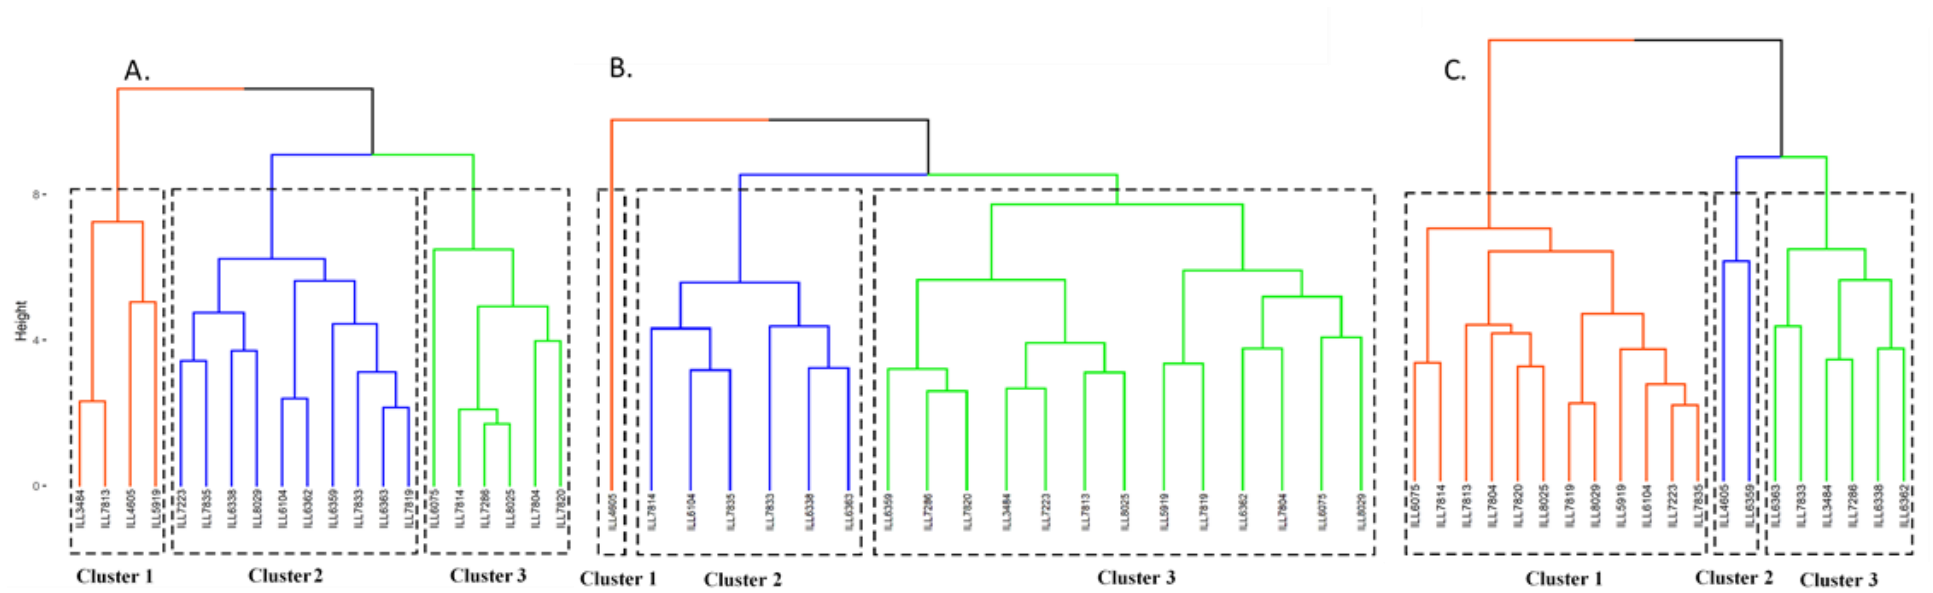

**Figure S1.** Dendrogram normal (a), temperature stress (b) and the combined temperature-drought stress (c) condition.
